# Supplementary material for: Effects of cadmium sulfide nanoparticles on sulfate bioreduction and oxidative stress in Desulfovibrio desulfuricans
Source: PubMed Central journal article supplement (PMC10991916; doi:10.1186/s40643-022-00523-5), 2022-04-01
Supplement: 40643_2022_523_MOESM1_ESM.pdf [file 40643_2022_523_MOESM1_ESM.pdf]

## Supplementary material

### 1 Screening and identification of sulfate-reducing bacteria

In this study, a sulfate-reducing strain was screened from sludge in our lab. After the primary and second isolation, the partial results of sulfate reduction efficiency of sulfate-reducing bacteria were shown in Fig. S1 of supplementary material. The sulfate reduction efficiency of No. 9 was the highest than those of others. The results of physiological and biochemical characteristics of No. 9 were shown in Table S1 of supplementary material, which were consistent with those of *D. desulfuricans*. The results of sequence of 16S rRNA of No. 9 indicated that there were 99.7% homology similarity with that of (NR\_104990.1) *D. desulfuricans* strain Essex 6. The phylogenetic tree of No. 9 based on 16S rRNA sequences was shown in Fig. S2 of supplementary material. According to above results, the target strain No. 9 was identified as genus *Desulfovibrio* and named as *D. desulfuricans* C09.

**Table S1.** Results of the physiological and biochemical experiment of *Desulfovibrio desulfuricans*

C09

| Test name        | Results |
|------------------|---------|
| Gram staining    | -       |
| Indole test      | +       |
| Methyl red test  | -       |
| V-P              | -       |
| Gelatin          | -       |
| Hydrogen sulfide | +       |

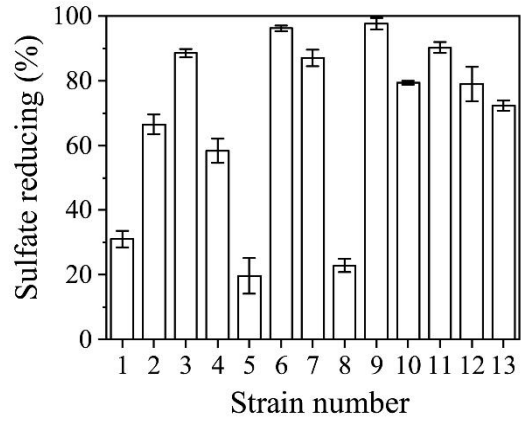

1

2

**Fig. S1.** Sulfate reduction efficiency of part of isolated strains

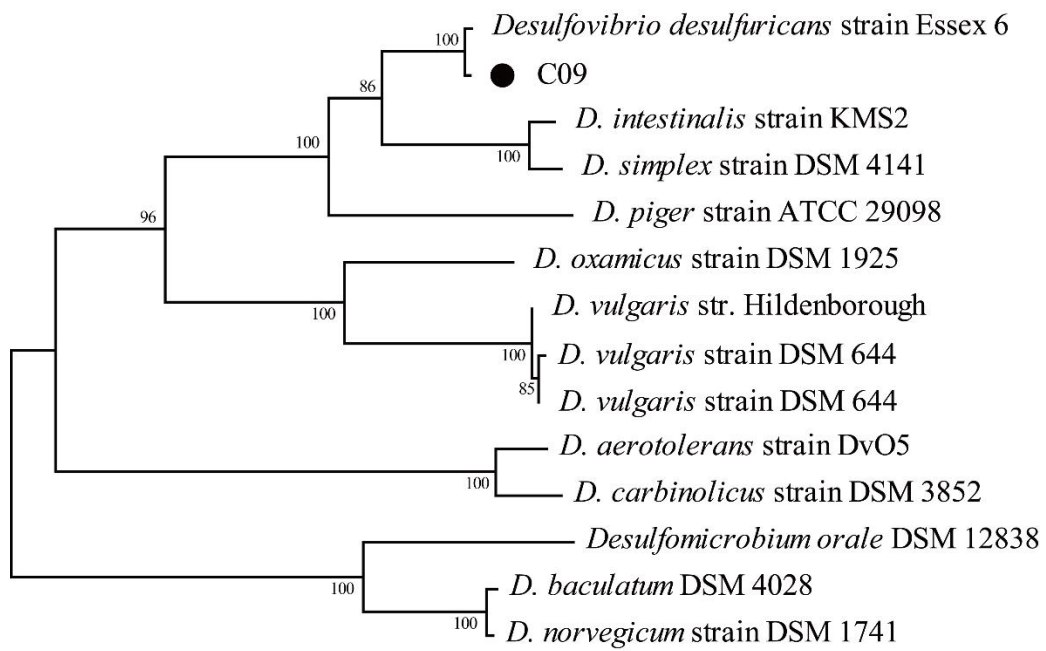

1 0.01

1

2

**Fig. S2.** Phylogenetic tree of C09 based on 16S rRNA gene sequences

### The gene sequence of C09 strain

1  
2 AAGTCGACGCGAAAGGGACTTCGGTCCTGAGTAAAGTGGCGCACGGGTGAGTAA  
3 CGCGTGGATAATCTGCCCTTATGATCGGGATAACAGTTGGAAACGGCTGCTAATACCGG  
4 ATACGCTCAAATGAACTTTTTGAGGAAAGATGGCCTCTGCTTGCATGCTATCACGTAA  
5 GGATGAGTCCGCGTCCCATTAGCTTGTGGCGGGGTAACGGCCCACCAAGGCAACGAT  
6 GGGTAGCCGATTTGAGAGGATGATCGGCCACACTGGAAGTAAACACGGTCCAGACT  
7 CCTACGGGAGGCAGCAGTGGGGAATATTGCGCAATGGGCGAAAGCCTGACGCAGCGA  
8 CGCCGCGTGAGGGATGAAGTTTTTCGGATCGTAAACCTCTGTCAGAAGGGAAGAAAC  
9 TACGTTGTGCTAATCAGCAGCGTACTGACGGTACCTTCAAAGGAAGCACCGGCTAACT  
10 CCGTGCCAGCAGCCGCGTAATACGGAGGGTGCAAGCGTTAATCGGAATTACTGGGCG  
11 TAAAGCGCACGTAGGCTGTAGTGTAAGTCAGGGGTGAAATCCCACGGCTCAACCGTGG  
12 AACTGCCTTTGATACTGCACAACCTGAATCCGGGAGAGGGTGGCGGAATTCCAGGTGT  
13 AGGAGTGAAATCCGTAGATATCTGGAGGAACATCAGTGGCGAAGGCGGCCACCTGGA  
14 CCGGTATTGACGCTGAGGTGCGAAAGCGTGGGGAGCAAACAGGATTAGATACCCTGGT  
15 AGTCCACGCTGTAAACGATGGATGCTAGATGTGGGGAGTATTCTTCGGTGTCTAGTT  
16 AACGCGTTAAGCATCCCGCCTGGGGAGTACGGTCGCAAGGCTGAAACTCAAAGAAAT  
17 TGACGGGGGCCCCGCACAAGCGGTGGAGTATGTGGTTTAATTCGATGCAACGCGAAGA  
18 ACCTTACCTAGGTTTGACATCCACGGAACCCTCCCGAAAAGGAGGGGTGCCCTTCGGG  
19 GAGCCGTGTGACAGGTGCTGCATGGCTGTCGTCAGCTCGTGTCTGAGATGTTGGGTT  
20 AAGTCCCGCAACGAGCGCAACCCCTATGGATAGTTGCCAGCAAGTAATGTTGGGCACT  
21 CTATTCAGACTGCCCGGGTTAACCGGGAGGAAGGTGGGGACGACGTCAAGTCATCATG  
22 GCCCTTACGCCTAGGGCTACACACGTACTACAATGGCGCGCACAAAGGGGAGCGAGA  
23 CCGCGAGGTGGAGCCAATCCCAAAAACGCGTCCCAGTCCGGATTGCAGTCTGCAAC  
24 TCGACTGCATGAAGTTGGAATCGCTAGTAATTCGAGATCAGCATGCTCGGGTGAATGCG  
25 TTCCCGGGCCTTGTACACACCGCCCGTACACCACGAAAGTCGGTTTTACCCGAAGCC  
26 GGTGAGCCAACCAGCAATGGAGGC
